# Supplementary material
Source: PubMed Central journal article supplement (PMC5004715)
Supplement: mol-22-15_250_Zhang_Suppl.pdf [file mol-22-15_250_Zhang_Suppl.pdf]

Supplemental Data

Plumbagin Protects Mice from Lethal Sepsis by Modulating Immunometabolism Upstream of PKM2

Zhaoxia Zhang,<sup>1</sup> Wenjun Deng,<sup>2</sup> Rui Kang,<sup>3</sup> Min Xie,<sup>2</sup> Timothy Billiar,<sup>3</sup> Haichao Wang,<sup>4</sup> Lizhi Cao,<sup>2</sup> and Daolin Tang<sup>3</sup>

Online address: <http://www.molmed.org>

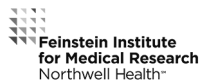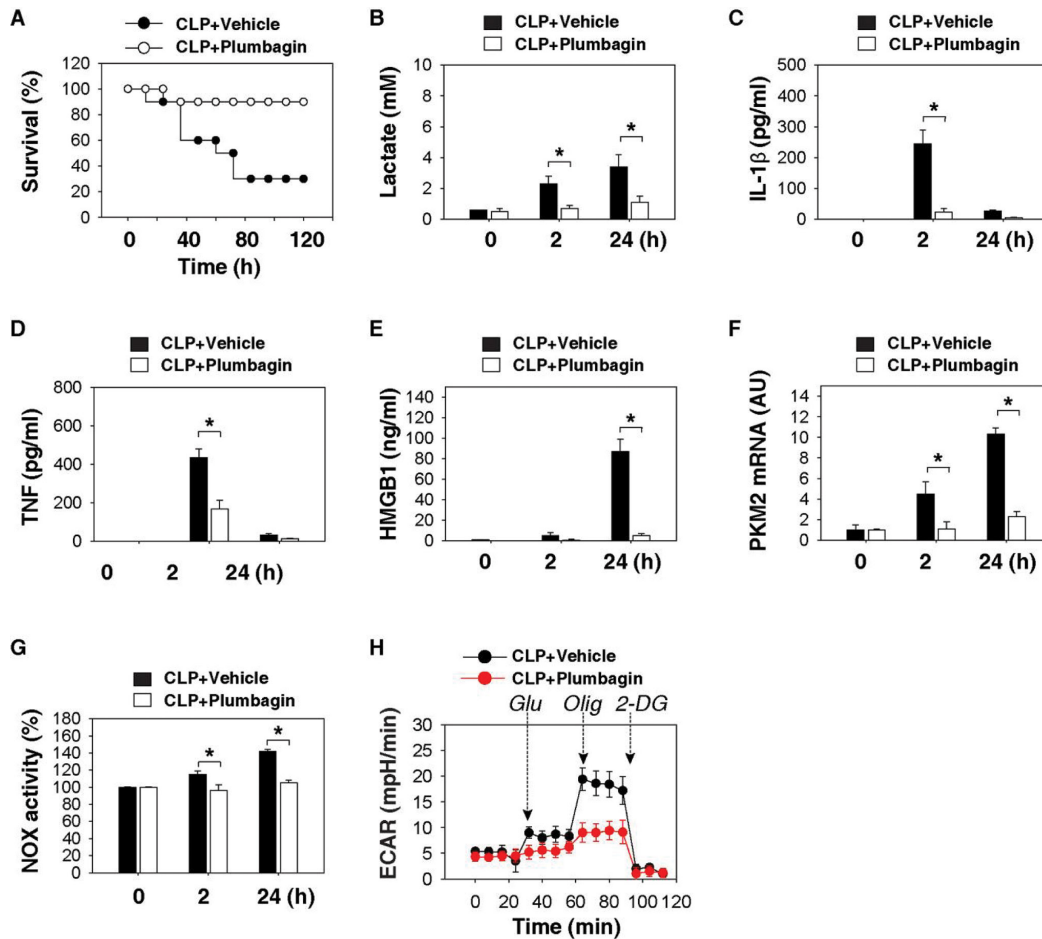

**Supplementary Figure S1.** Early treatment with plumbagin protects mice from sepsis. (A) The cecal ligation and puncture (CLP) technique was used to induce intraabdominal sepsis in mice (n=20/group). Repeated administration of plumbagin (4 mg/kg) at -2 and 6 h after CLP significantly increased survival compared with vehicle group (\*, P<0.05), as measured by Kaplan-Meier test. (B-H) In parallel experiments, serum levels of lactate (B), IL-1 $\beta$  (C), TNF (D), HMGB1 (E) and PKM2 mRNA (F), NOX activity (G), and ECAR (H) in isolated peritoneal macrophages at indicated time points were measured (n=3-5 animals/group, values are mean  $\pm$  SEM, \*, P<0.05).
